# Supplementary material
Source: PubMed Central journal article supplement (PMC3986130)
Supplement: 1322933111_pnas.201322933SI.pdf [file 1322933111_pnas.201322933SI.pdf]

# Supporting Information

Wan and Stubbs 10.1073/pnas.1322933111

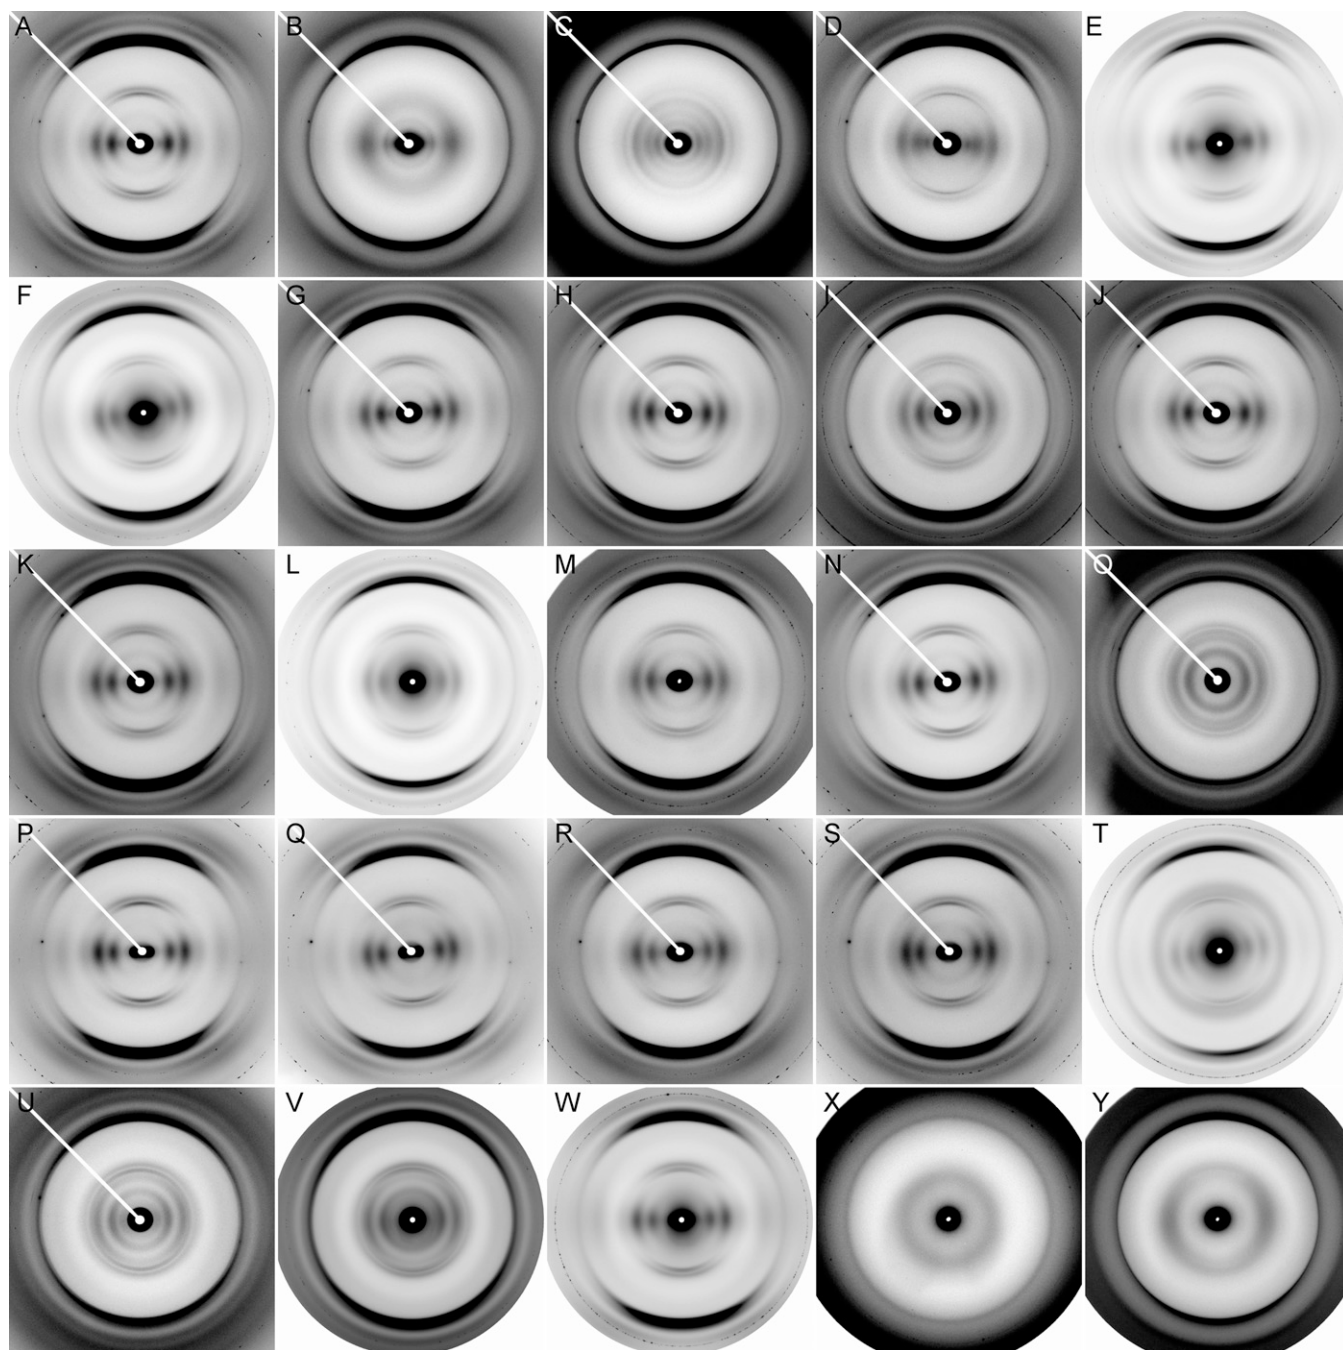

Fig. S1. X-ray fiber diffraction from HET-s(218–289) mutants. (A) WT, (B) RL, (C) SL, (D)  $\Delta$ 251–253, (E) PA, (F) PB, (G) PAB, (H) SA<sup>-</sup>, (I) SB<sup>-</sup>, (J) SC<sup>-</sup>, (K) SABC<sup>-</sup>, (L) SB<sup>+</sup>, (M) SA<sup>+</sup>, (N) SC<sup>+</sup>, (O) SABC<sup>+</sup>, (P) NA, (Q) NB, (R) NC, (S) ND, (T) NAB, (U) NAD, (V) NBC, (W) NCD, (X) SN<sup>-</sup>, and (Y) SN<sup>+</sup>.

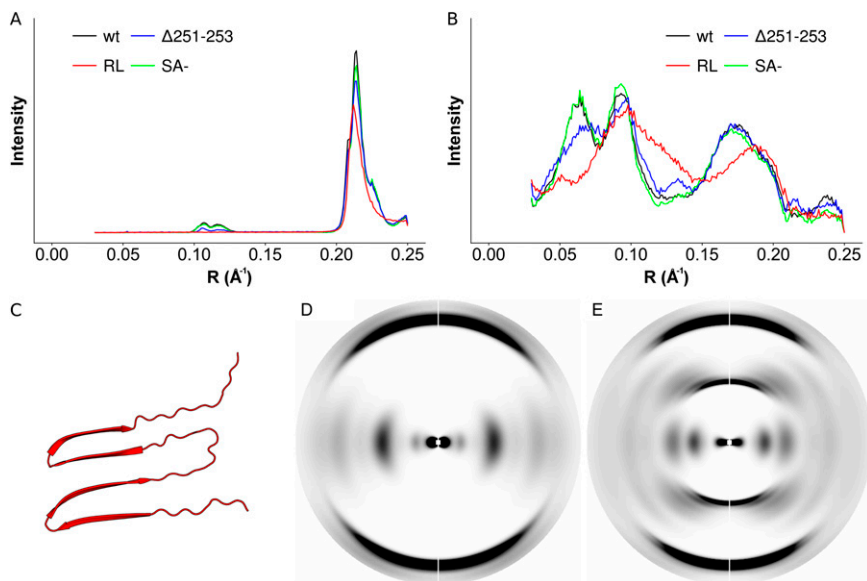

**Fig. S2.** Representative plots and simulated X-ray diffraction. (A) Meridional and (B) equatorial plots from WT,  $\Delta 251-253$ , RL, and SA-. SA- has diffraction nearly identical to that of WT, whereas  $\Delta 251-253$  has a similar equator and an attenuated 9.4-Å meridional reflection. RL has a substantially different equator and no 9.4-Å meridional reflection. (C) A generic stacked  $\beta$ -sheet model and (D) its calculated diffraction pattern. (E) Calculated diffraction pattern from the two-rung  $\beta$ -solenoid solid-state NMR structure of HET-s(218–289) (PDB ID code 2kj3).

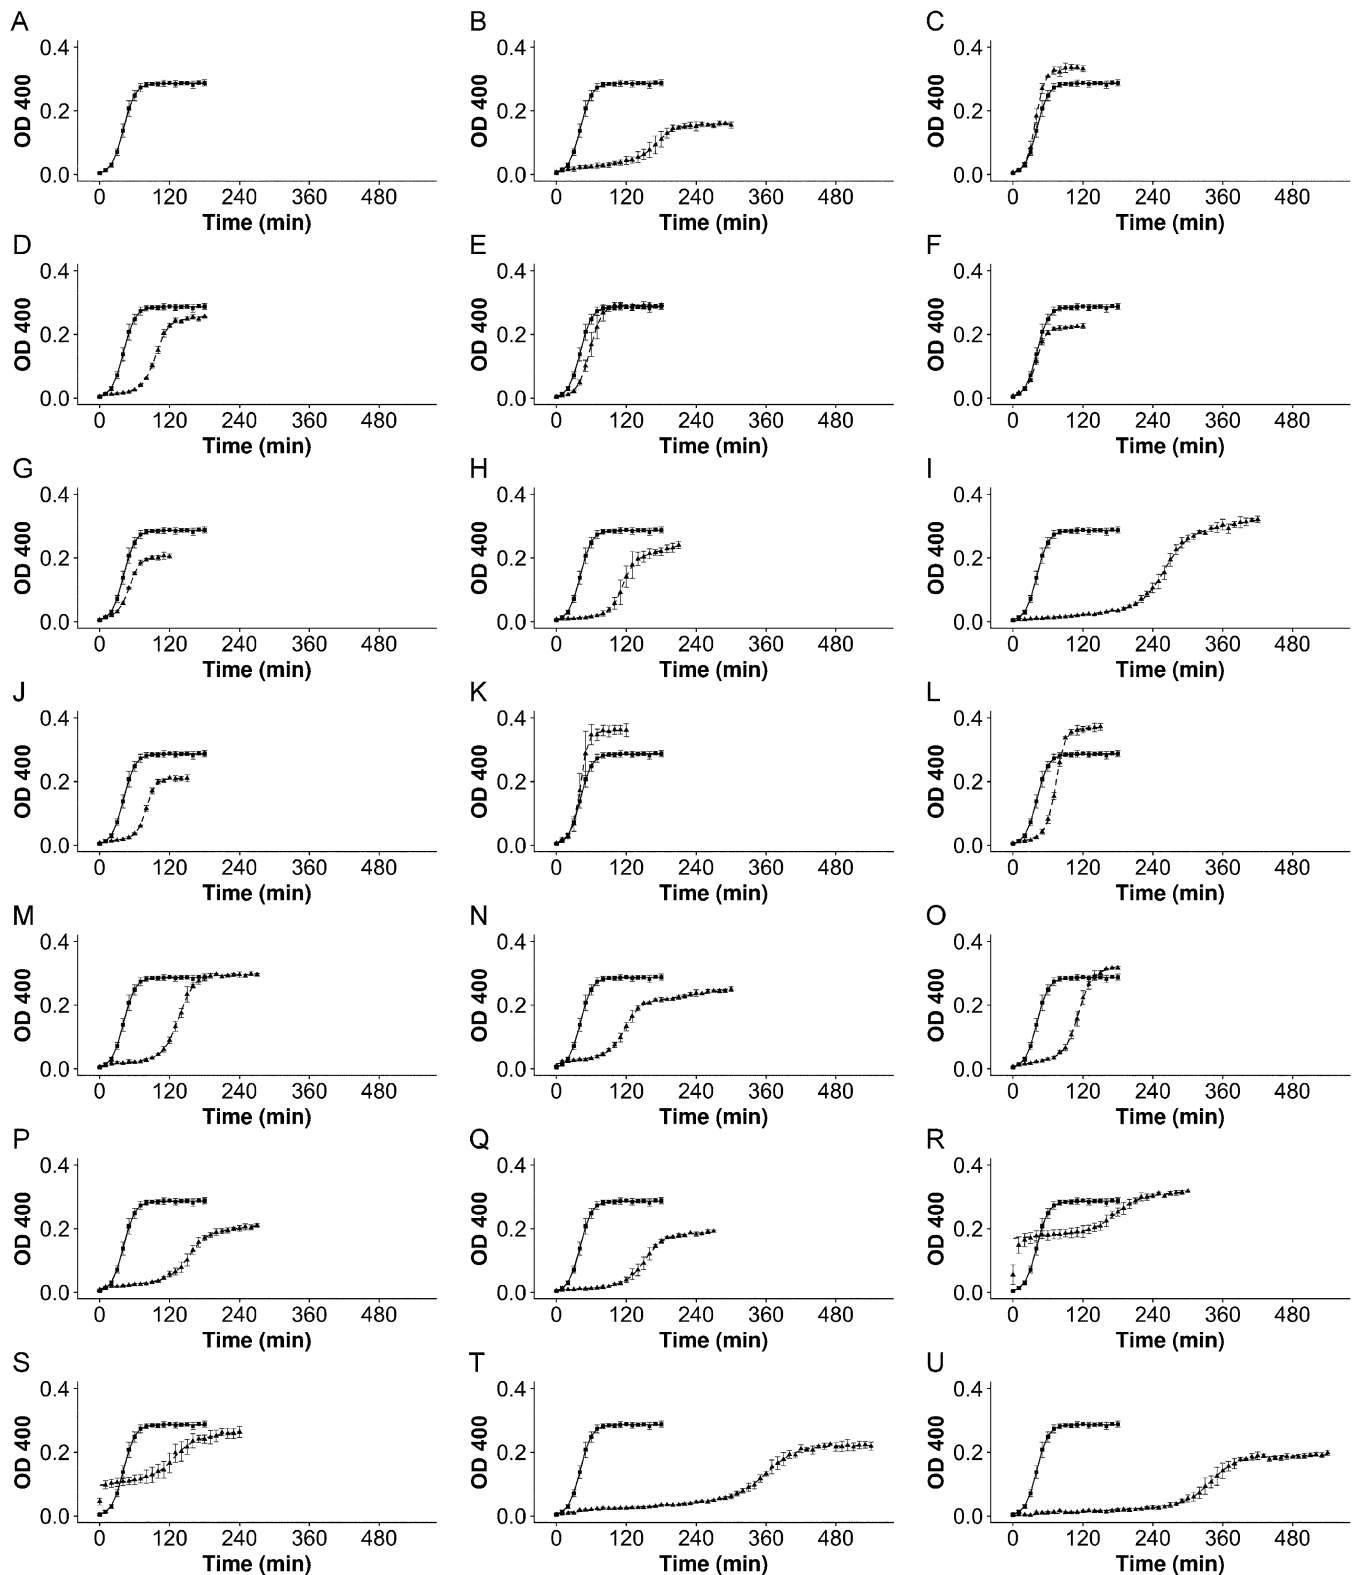

**Fig. 53.** Fibrillization kinetics assays of HET-s(218–289) mutants. (A) WT, (B)  $\Delta 251$ –253, (C) PA, (D) PB, (E) PAB, (F) SA<sup>-</sup>, (G) SB<sup>-</sup>, (H) SC<sup>-</sup>, (I) SABC<sup>-</sup>, (J) SB<sup>+</sup>, (K) SA<sup>+</sup>, (L) SC<sup>+</sup>, (M) SABC<sup>+</sup>, (N) NA, (O) NB, (P) NC, (Q) ND, (R) NAB, (S) NAD, (T) NBC, and (U) NCD. Points represent averaged data, error bars represent standard deviation, and lines indicate fitted curves. WT is shown as ■ and solid lines; mutants are shown as ▲ and dotted lines.

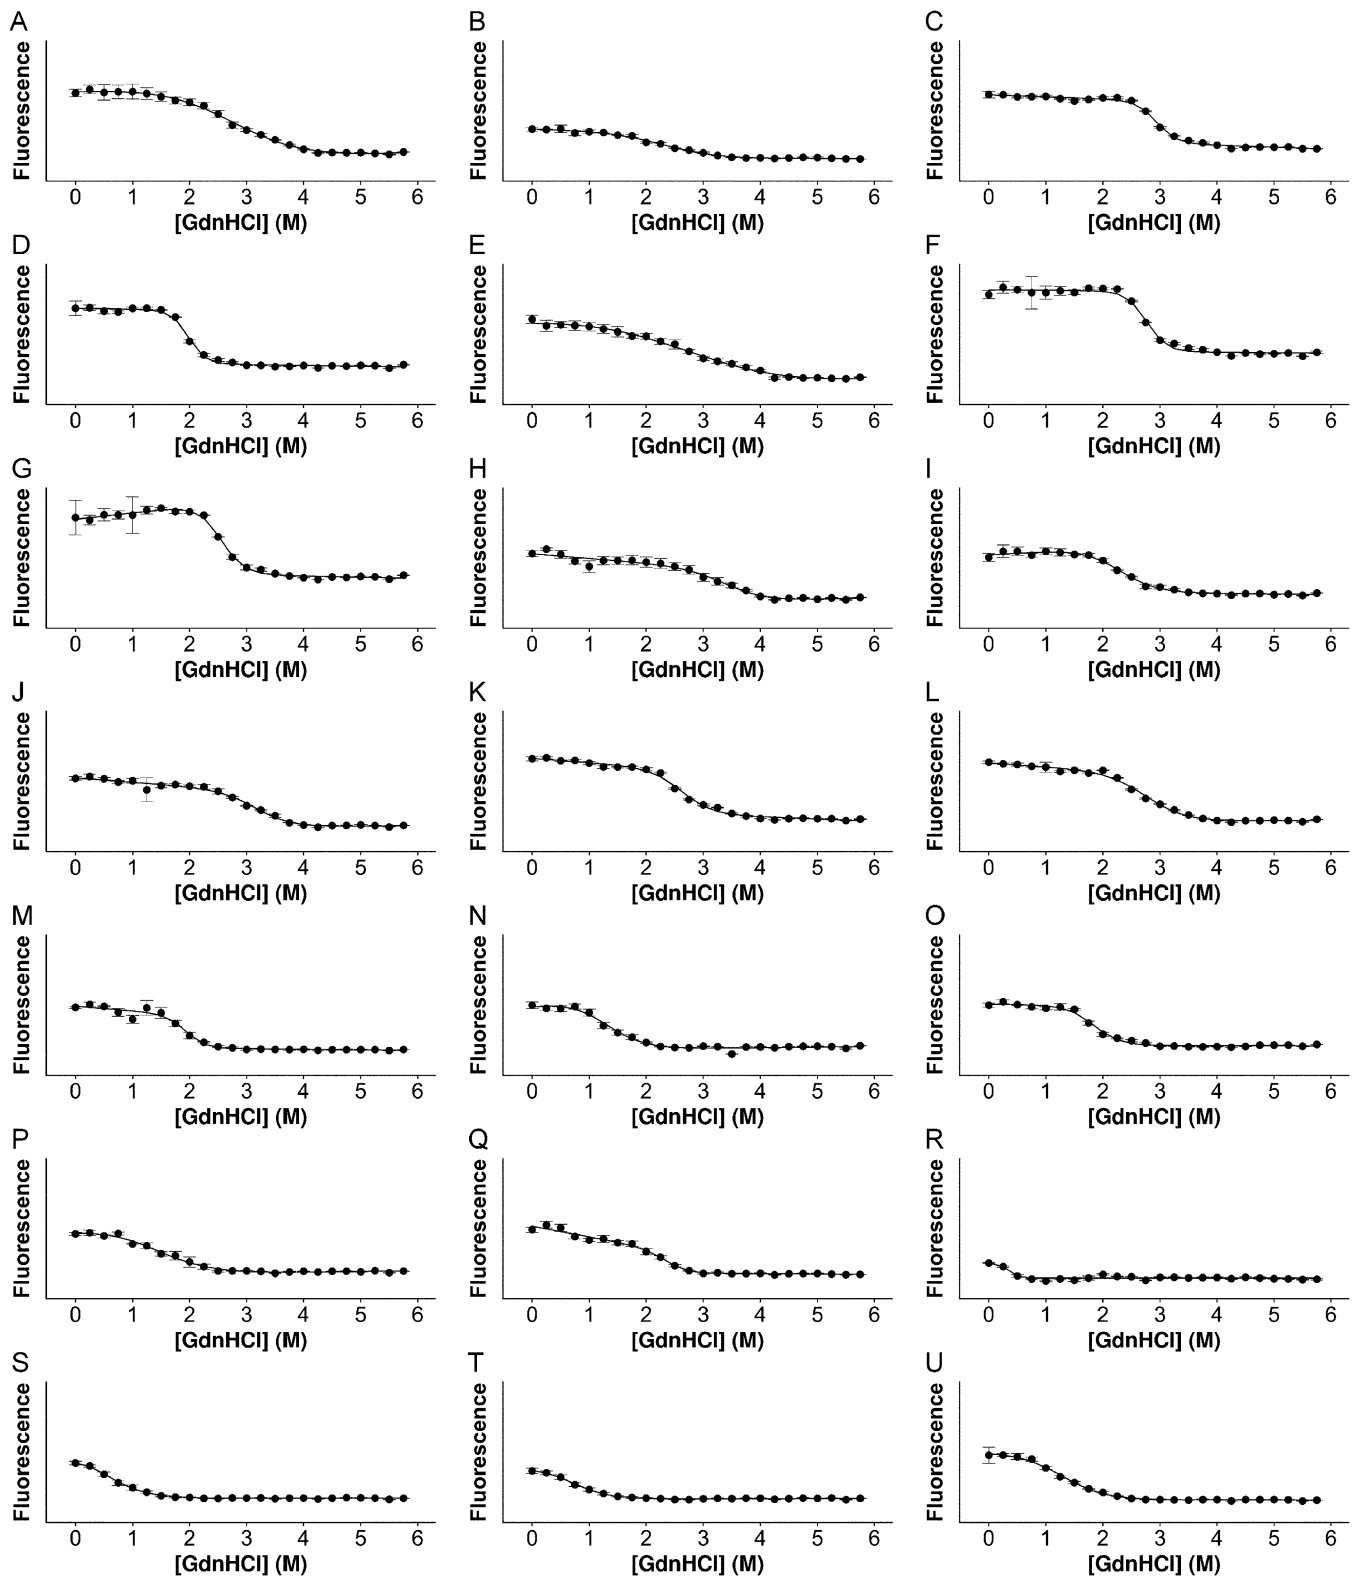

**Fig. 54.** Guanidine denaturation assays of HET-s(218–289) mutants. (A) WT, (B)  $\Delta$ 251–253, (C) PA, (D) PB, (E) PAB, (F) SA $^-$ , (G) SB $^-$ , (H) SC $^-$ , (I) SABC $^-$ , (J) SB $^+$ , (K) SA $^+$ , (L) SC $^+$ , (M) SABC $^+$ , (N) NA, (O) NB, (P) NC, (Q) ND, (R) NAB, (S) NAD, (T) NBC, and (U) NCD. ● represents averaged data points, error bars represent SD, and lines represent fitted curves.

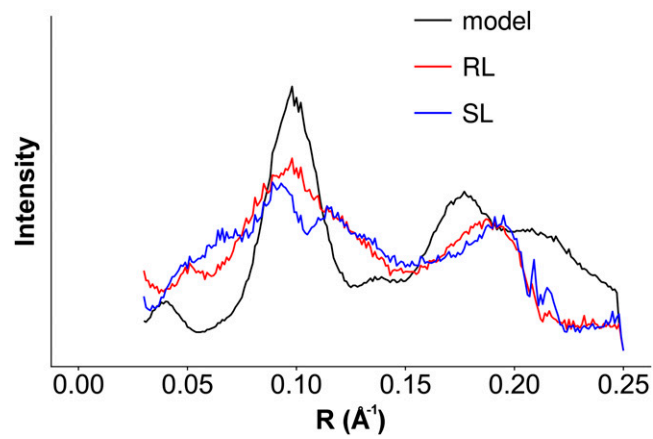

Fig. S5. Equatorial plots calculated from the stacked-sheet model, experimentally observed from RL and experimentally observed from SL.

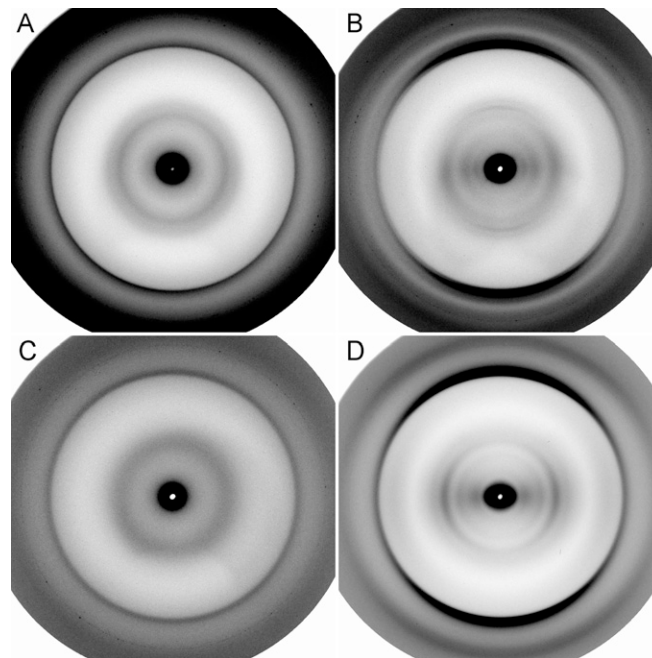

Fig. S6. X-ray fiber diffraction from HET-s(218–289) seeded with WT fibrils. (A) RL, (B) SL, (C) SN-, and (D) SN+.

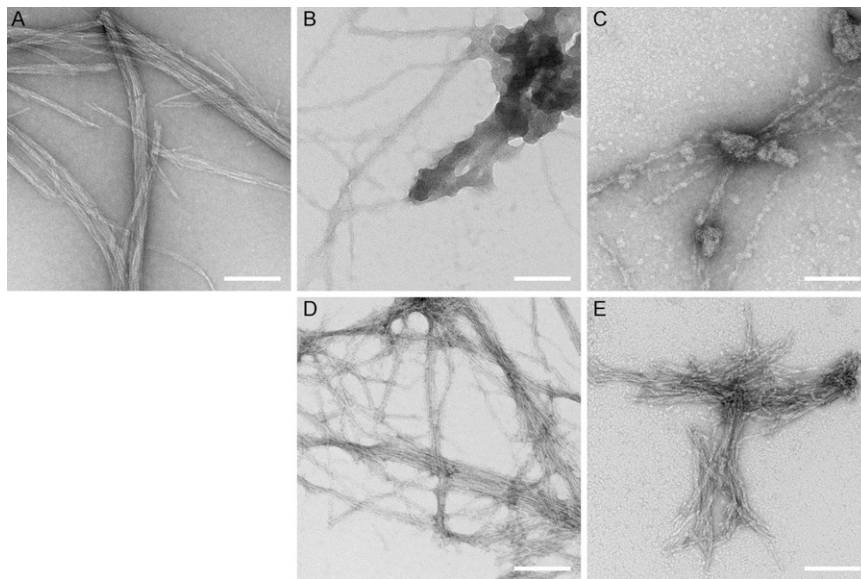

**Fig. 57.** Negative-stain EM of HET-s(218–289) WT and double asparagine-ladder mutants. (A) Mature WT, (B) NAB at 30 min, (C) NAD at 30 min, (D) NAB at 4 h, and (E) NAD at 4 h. (Scale bars, 100 nm.)

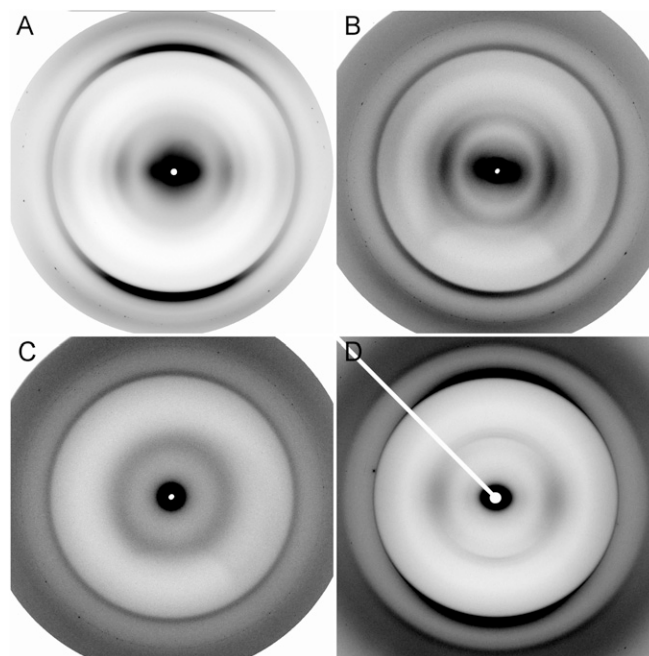

**Fig. 58.** X-ray fiber diffraction from double asparagine-ladder mutants at pH 4.0. (A) NAB, (B) NAD, (C) NBC, and (D) NCD.

**Table S1. D spacings for disoriented fiber diffraction specimens**

| Mutant | Meridional             | Equatorial       | Rings      |
|--------|------------------------|------------------|------------|
| WT     | 9.47, 8.70, 4.83, 4.70 | 16.3, 10.6, 5.66 | —          |
| SABC+  | 9.61, 8.68, 4.82, 4.70 | 16.5, 11.0, 5.67 | —          |
| NAD    | 9.54, 8.52, 4.84, 4.72 | 16.3, 10.7, 5.71 | —          |
| NBC    | 9.42, 8.64, 4.70       | 16.1, 10.7, 5.59 | —          |
| SN-    | —                      | —                | 4.45, 9.91 |
| SN+    | —                      | —                | 4.48, 9.84 |

Diffraction patterns with no orientation and no discernible axes are tabulated as rings.
